# Supplementary material for: Evidence for Range Expansion and Origins of an Invasive Hornet Vespa bicolor (Hymenoptera, Vespidae) in Taiwan, with Notes on Its Natural Status
Source: MDPI journal article supplement (doi:10.3390/insects12040320), 2021-04-02
Supplement: s1 [file s1]

```

6911145661111111122222222222233333333333444444455555555555666666
23897060336678890113344456889111233457900258990234444589900013
8282510981034803687251258239815328630287320369554603963  N
Hap_1  ATTCACATCCTTCAATTCTTCTGCTCTTAAGTCTTAAGTCCCTCCTTTTCATTTTACAGCTT  2
Hap_2  ..A...GCTT..T..C.T.C.T...C.C.GTA.T.CT.....TT.TA.....C.....C.  1
Hap_3  GA.T.TG.T.C.TTGC.TT...CA.C..CG.A.T...T..TATC.TCC.TG.CC..TT.AT.C  23
Hap_4  G...GTC.TTCAT...CATCCTCC.CT....ACT...CTAT.T..TT..CTG.C.CC..GT.C.  1
Hap_5  GA.T.TG.T.C.TTGC.TT...CATC..CG.A.TC...T..TATC.TCC.TGCCC..TT.AT.C  1
Hap_6  GA.T.TG.T.C.TTGC.TT...CA.C..CG.A.T...T..TATC.TCC.TGCCC.CTT.A..C  1
Hap_7  .....AC.....GA...  1

```

**Figure S1.** Sequence variation of 7 haplotypes of *V. bicolor* in the COI region. Haplotype sample from: Hap\_1: Vietnam, Hap\_2: Beijing, Hap\_3: Taiwan, Hap\_4: Nepal, Hap\_5: Huangshan, Hap\_6: Hong Kong, Hap\_7: Vietnam. Dots “.” denote identity with the reference sequence. The number of individuals sharing the same haplotypes is indicated in the right column by “N”.

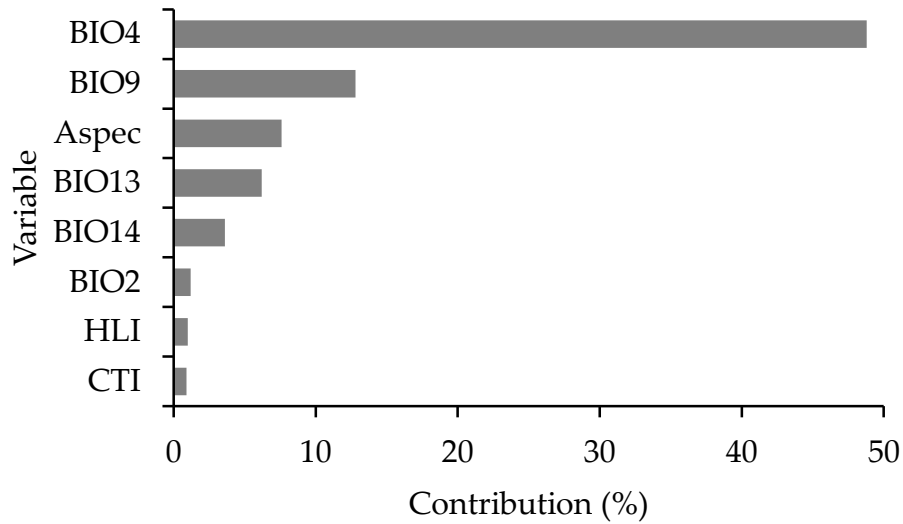

**Figure S2.** Variables contribution for modeling.

**Table S1.** List of environmental variables used in the model development.

| Variables                                                  | Code  |
|------------------------------------------------------------|-------|
| Annual mean temperature                                    | BIO1  |
| Mean diurnal range (Mean of monthly (max temp - min temp)) | BIO2  |
| Isothermality (BIO2/BIO7) (×100)                           | BIO3  |
| Temperature seasonality (Standard deviation×100)           | BIO4  |
| Maximum temperature of warmest month                       | BIO5  |
| Minimum temperature of coldest month                       | BIO6  |
| Temperature annual range (BIO5 - BIO6)                     | BIO7  |
| Mean temperature of wettest quarter                        | BIO8  |
| Mean temperature of driest quarter                         | BIO9  |
| Mean temperature of warmest quarter                        | BIO10 |
| Mean temperature of coldest quarter                        | BIO11 |
| Annual precipitation                                       | BIO12 |

|                                                      |       |
|------------------------------------------------------|-------|
| Precipitation of wettest month                       | BIO13 |
| Precipitation of driest month                        | BIO14 |
| Precipitation seasonality (Coefficient of variation) | BIO15 |
| Precipitation of wettest quarter                     | BIO16 |
| Precipitation of driest quarter                      | BIO17 |
| Precipitation of warmest quarter                     | BIO18 |
| Precipitation of coldest quarter                     | BIO19 |
| Elevation                                            | Eleva |
| Slope                                                | Slope |
| Aspect                                               | Aspec |
| Compound topographic index                           | CTI   |
| Heat load index                                      | HLI   |

---
